# Supplementary material for: Chemical Profiling and Biological Evaluation of Nepeta baytopii Extracts and Essential Oil: An Endemic Plant from Turkey
Source: MDPI journal article supplement (doi:10.3390/plants10061176), 2021-06-09
Supplement: s1 [file s1]

# Chemical Profiling and Biological Evaluation of *Nepeta baytopii* Extracts and Essential Oil: An Endemic Plant from Turkey

Gokhan Zengin<sup>1</sup>, Mohamad Fawzi Mahomoodally<sup>2</sup>, Abdurrahman Aktumsek<sup>1</sup>, József Jekő<sup>3</sup>, Zoltán Cziáky<sup>3</sup>, Maria João Rodrigues<sup>4</sup>, Luisa Custodio<sup>4</sup>, Rıdvan Polat<sup>5</sup>, Ugur Cakilcioglu<sup>6</sup>, Adnan Ayna<sup>7</sup>, Monica Gallo<sup>8\*</sup>, Domenico Montesano<sup>9\*</sup>, Carene Picot-Allain<sup>2</sup>

<sup>1</sup>Physiology and Biochemistry Research Laboratory, Department of Biology, Science Faculty, Selcuk University, Campus, 42130 Konya, Turkey. Email: [gokhanzengin@selcuk.edu.tr](mailto:gokhanzengin@selcuk.edu.tr) (G.Z.) and [aktumsek@selcuk.edu.tr](mailto:aktumsek@selcuk.edu.tr) (A.A.)

<sup>2</sup>Department of Health Sciences, Faculty of Medicine and Health Sciences, University of Mauritius, Réduit 230, Mauritius. Email: [f.mahomoodally@uom.ac.mu](mailto:f.mahomoodally@uom.ac.mu) (M.F.M.) and [picotcarene@yahoo.com](mailto:picotcarene@yahoo.com) (C.P.)

<sup>3</sup>Agricultural and Molecular Research and Service Institute, University of Nyíregyháza, Nyíregyháza, Hungary. Email: [cziaky.zoltan@nye.hu](mailto:cziaky.zoltan@nye.hu) (C.Z.) and [jjozsi@gmail.com](mailto:jjozsi@gmail.com) (J.J.)

<sup>4</sup>Centre of Marine Sciences, University of Algarve, Faculty of Sciences and Technology, Ed. 7, Campus of Gambelas, 8005-139 Faro, Portugal. Email: [mary\\_p@sapo.pt](mailto:mary_p@sapo.pt) (M.J.R.) and [lcustodio@ualg.pt](mailto:lcustodio@ualg.pt) (L.C.)

<sup>5</sup>Department of Landscape Architecture, Faculty of Agriculture, Bingöl University, 12000, Bingöl, Turkey. Email: [rpolat@bingol.edu.tr](mailto:rpolat@bingol.edu.tr) (R.P.)

<sup>6</sup>Munzur University, Pertek Sakine Genç Vocational School, Tunceli, Turkey. Email: [ucakilcioglu@yahoo.com](mailto:ucakilcioglu@yahoo.com) (U.C.)

<sup>7</sup>Department of Chemistry, Faculty of Sciences and Arts, Bingöl University, 12000, Bingöl, Turkey. Email: [aayna@bingol.edu.tr](mailto:aayna@bingol.edu.tr) (A.Ay.)

<sup>8</sup>Department of Molecular Medicine and Medical Biotechnology, University of Naples Federico II, via Pansini, 5, 80131 Naples, Italy E-mail: [mongallo@unina.it](mailto:mongallo@unina.it) (M.G.)

<sup>9</sup>Department of Pharmacy, University of Naples Federico II, via D. Montesano 49, 80131 Naples, Italy. E-mail: [domenico.montesano@unina.it](mailto:domenico.montesano@unina.it) (D.M.)

\* Correspondence: [domenico.montesano@unina.it](mailto:domenico.montesano@unina.it) (D.M.); [mongallo@unina.it](mailto:mongallo@unina.it) (M.G.).

**Citation:** Zengin, G.; Mahomoodally, M.F.; Aktumsek, A.; Jekő, J.; Cziáky, Z.; Rodrigues, M.J.; Custodio, L.; Polat, R.; Cakilcioglu, U.; Ayna, A.; et al. Chemical Profiling and Biological Evaluation of *Nepeta baytopii* Extracts and Essential Oil: An Endemic Plant from Turkey. *Int. J. Mol. Sci.* **2021**, *10*, 1176. <https://doi.org/10.3390/plants10061176>

Academic Editor: Petko Denev

Received: 22 May 2021

Accepted: 7 June 2021

Published: 9 June 2021

**Publisher's Note:** MDPI stays neutral with regard to jurisdictional claims in published maps and institutional affiliations.

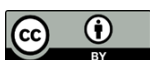

Copyright: © 2021 by the authors.

Submitted for possible open access

publication under the terms and

conditions of the Creative Commons

Attribution (CC BY) license

([https://creativecommons.org/](https://creativecommons.org/licenses/by/4.0/)

[licenses/by/4.0/](https://creativecommons.org/licenses/by/4.0/)).

RT: 0.00 - 70.00 SM: 7B

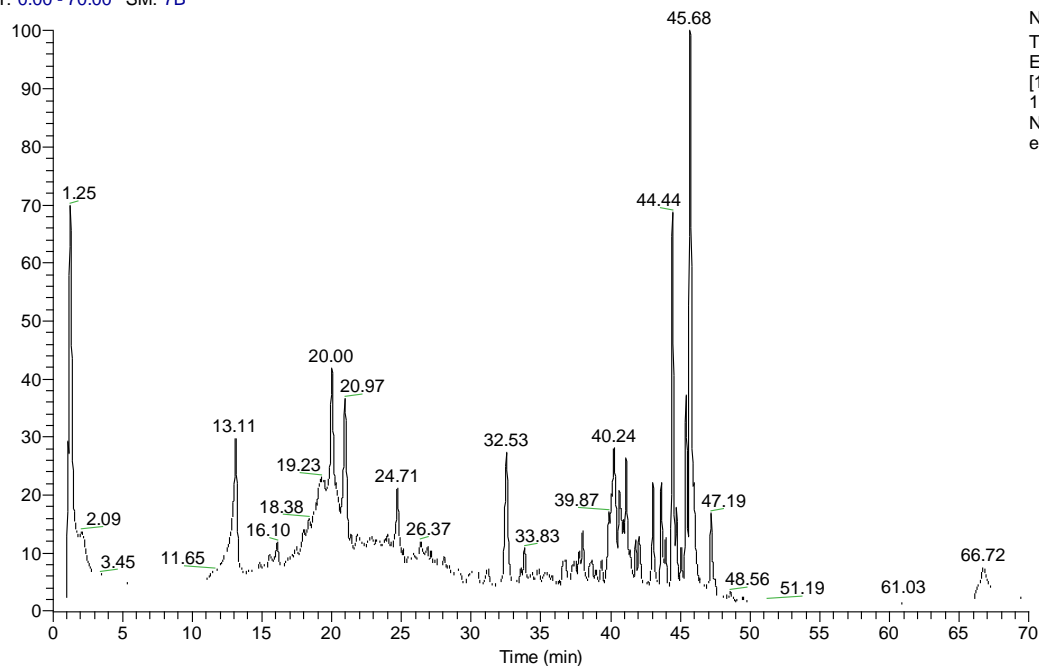

NL: 1.35E10  
TIC F: FTMS + p  
ESI Full ms  
[100.0000-  
1500.0000] MS  
Nepeta\_baytopii\_M  
eOH\_pos

(a)

RT: 0.00 - 70.00 SM: 7B

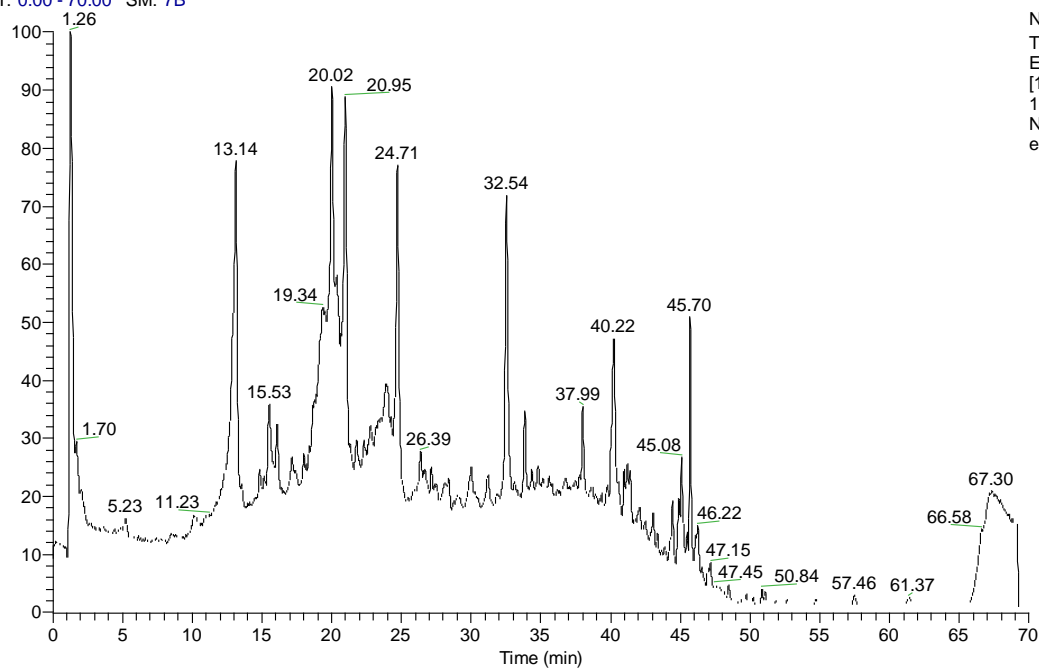

NL: 3.24E9  
TIC F: FTMS - p  
ESI Full ms  
[100.0000-  
1500.0000] MS  
Nepeta\_baytopii\_M  
eOH\_neg

(b)

Figure S1. Total ion chromatograms of methanol extract in positive ion mode (a) and negative ion mode (b)

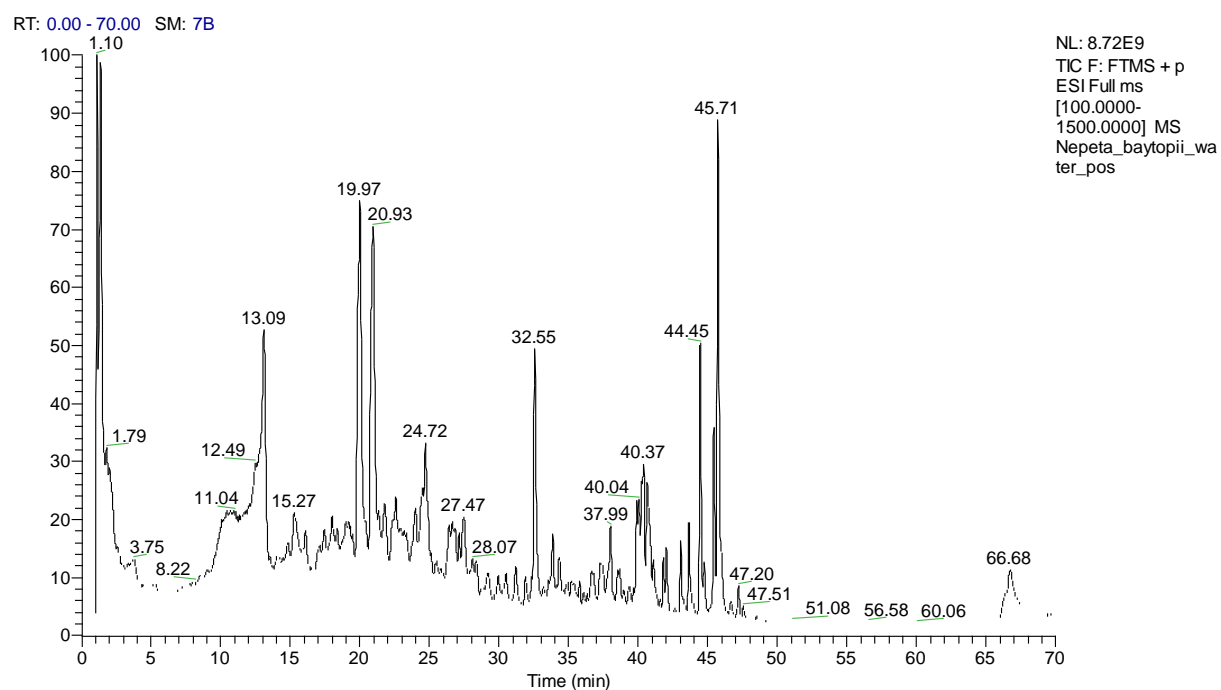

(a)

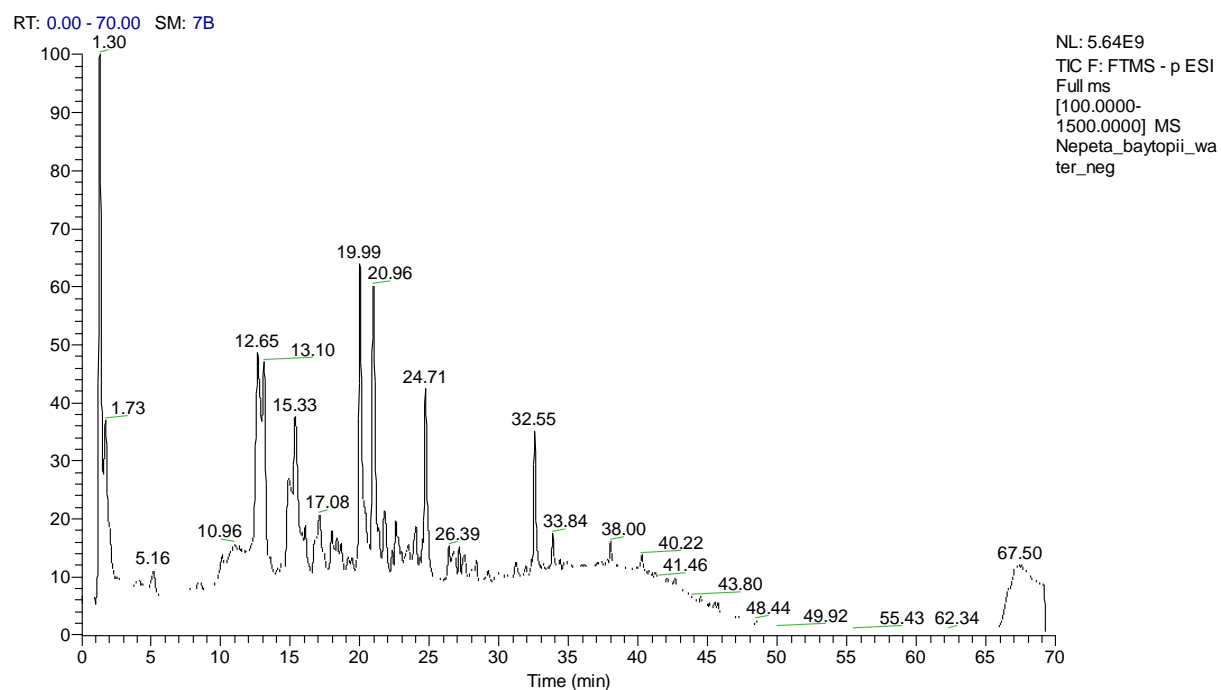

(b)

Figure S2. Total ion chromatograms of water extract in positive ion mode (a) and negative ion mode (b)
